# Supplementary material for: Flavonoid Preparations from Taraxacum officinale L. Fruits—A Phytochemical, Antioxidant and Hemostasis Studies
Source: PubMed Central journal article supplement (PMC7699217; doi:10.3390/molecules25225402), 2020-11-18
Supplement: molecules-25-05402-s001.pdf [file molecules-25-05402-s001.pdf]

## Supplementary Materials

Article

# Flavonoid Preparations from *Taraxacum officinale* L. Fruits-a Phytochemical, Antioxidant and Hemostasis Studies

Bernadetta Lis<sup>1</sup>, Dariusz Jedrejek<sup>2</sup>, Joanna Rywaniak<sup>3</sup>, Agata Soluch<sup>2</sup>, Anna Stochmal<sup>2</sup> and Beata Olas<sup>1,\*</sup>

<sup>1</sup> Department of General Biochemistry, Faculty of Biology and Environmental Protection, University of Lodz, 90-236 Lodz, Poland; bernadetta.lis@biol.uni.lodz.pl

<sup>2</sup> Department of Biochemistry and Crop Quality, Institute of Soil Science and Plant Cultivation, State Research Institute, 24-100 Pulawy, Poland; djedrejek@iung.pulawy.pl (D.J.); asoluch@iung.pulawy.pl (A.S.); asf@iung.pulawy.pl (A.S.)

<sup>3</sup> Department of Immunology and Infectious Biology, Institute of Microbiology, Biotechnology and Immunology, Faculty of Biology and Environmental Protection, University of Lodz, 90-237 Lodz, Poland; joanna.rywaniak@biol.uni.lodz.pl

\* Correspondence: beata.olas@biol.uni.lodz.pl

Received: 14 October 2020; Accepted: 15 November 2020; Published: 18 November 2020

## **Table of Contents:**

**Figure S1.** Flow diagram of extraction and fractionation of dandelion fruits

**Figure S2.** Structures of 14 fully identified metabolites in methanol extract and prepared phenolic preparations of *Taraxacum officinale* fruits

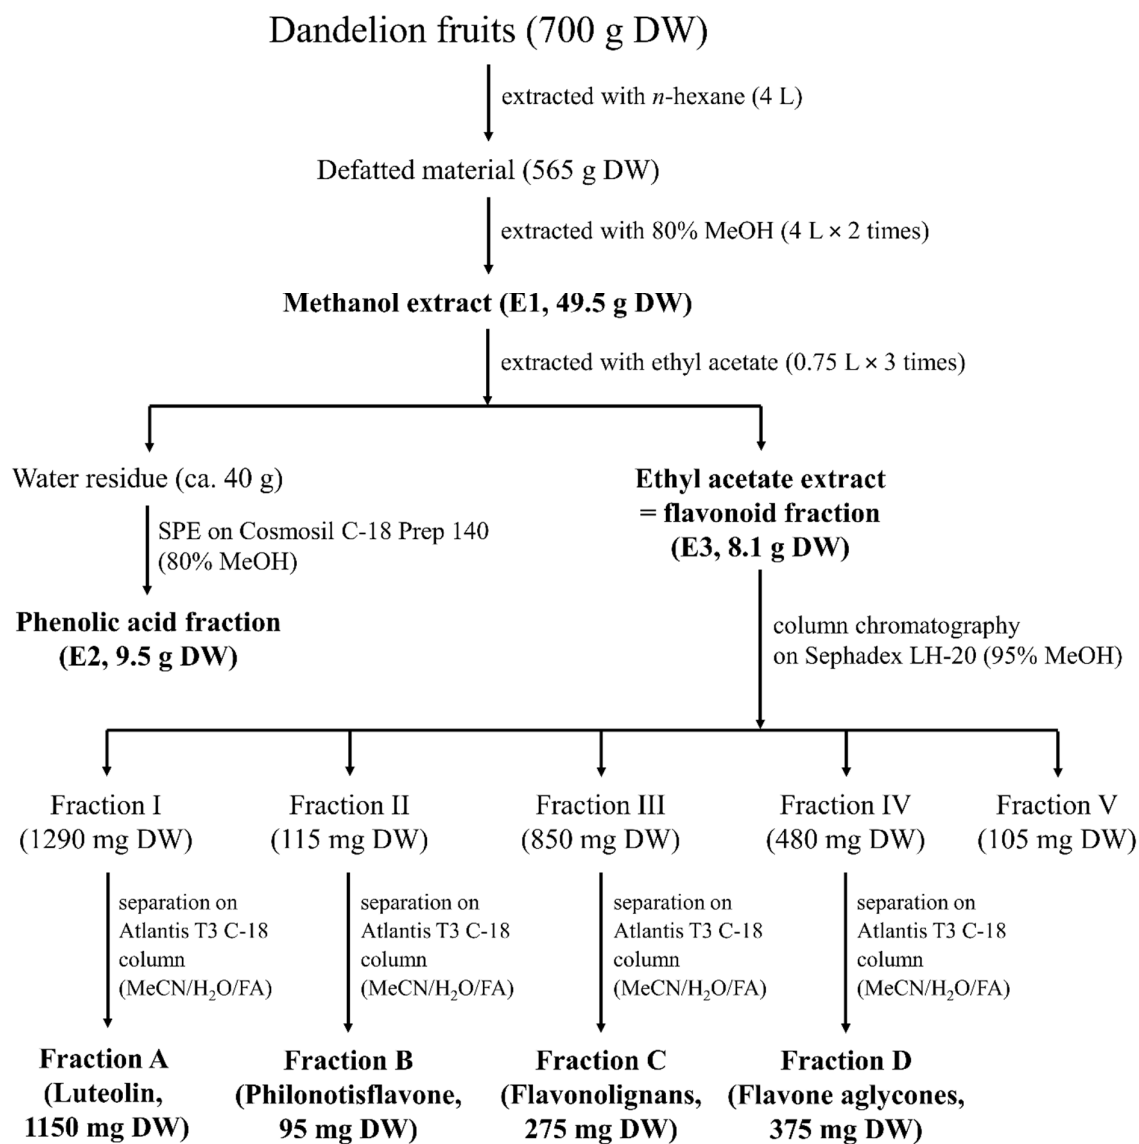

Figure S1. Flow diagram of extraction and fractionation of dandelion fruits

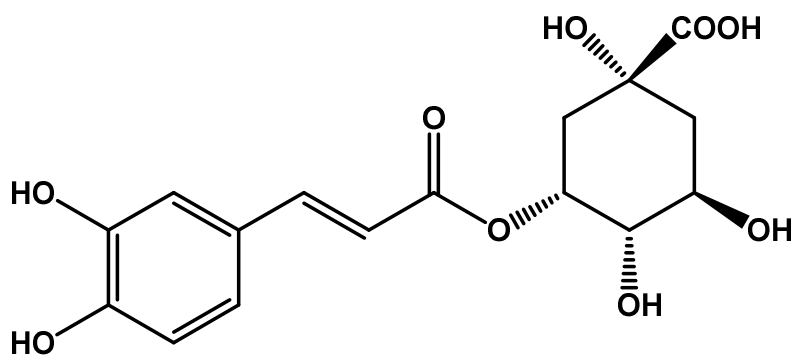

5-O-caffeoylquinic acid (MW = 354)

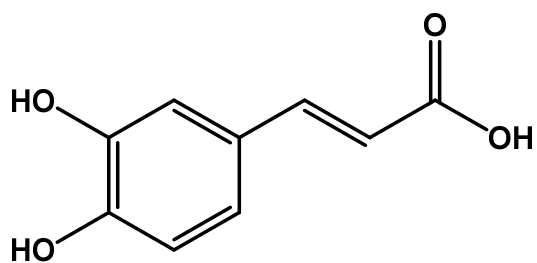

caffeic acid (MW = 180)

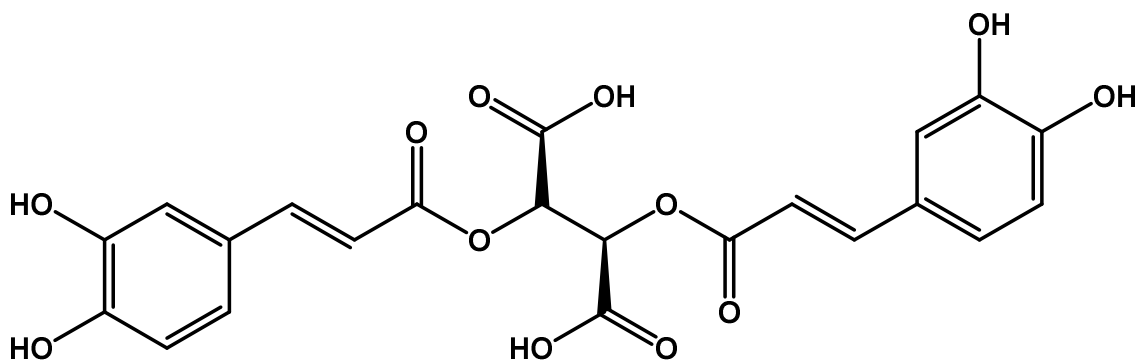

L-chicoric acid (MW = 474)

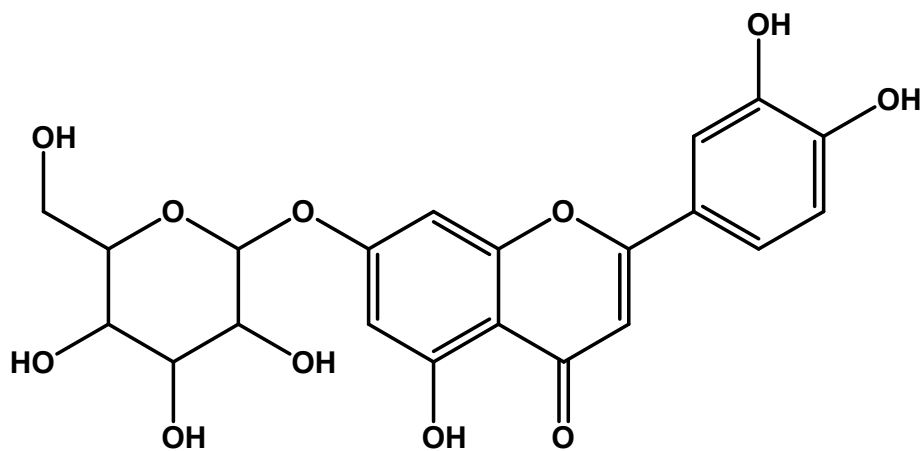

luteolin 7-O-glucoside (MW = 448)

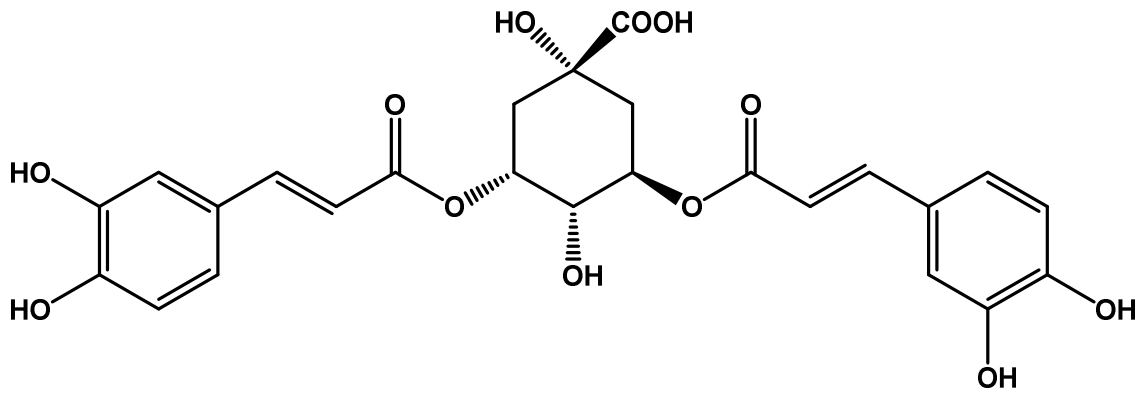

3,5-di-caffeoylquinic acid (MW = 516)

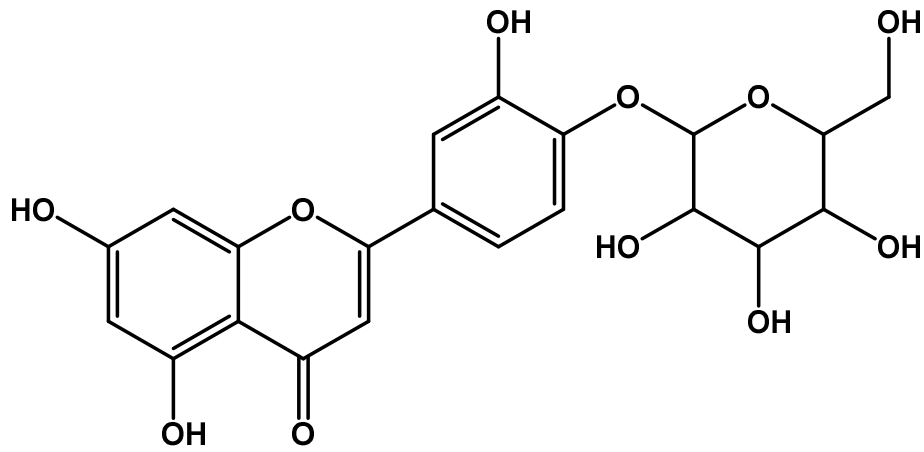

luteolin 4'-O-glucoside (MW = 448)

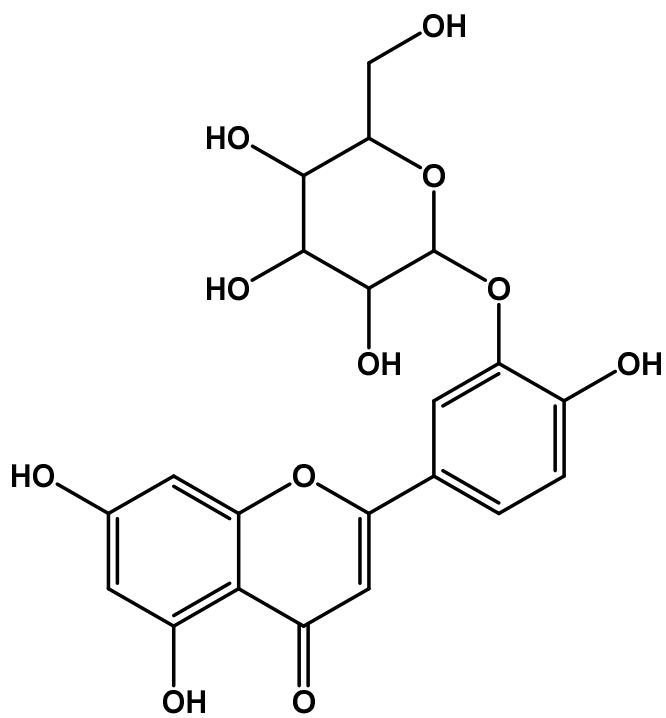

luteolin 3'-O-glucoside (MW = 448)

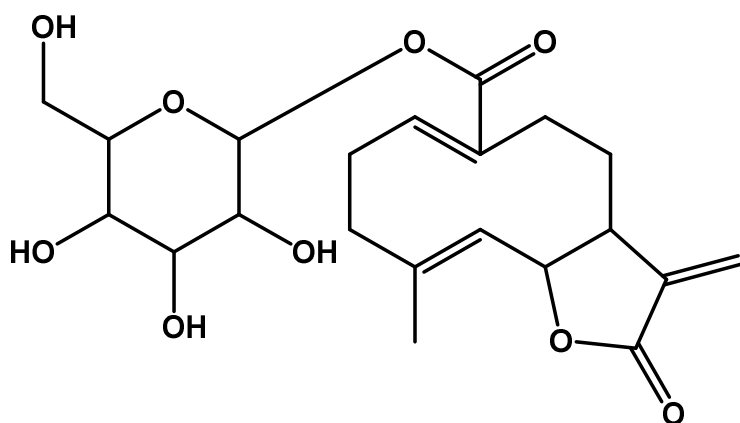

taraxinic acid 1'-O-glucoside (MW = 424)

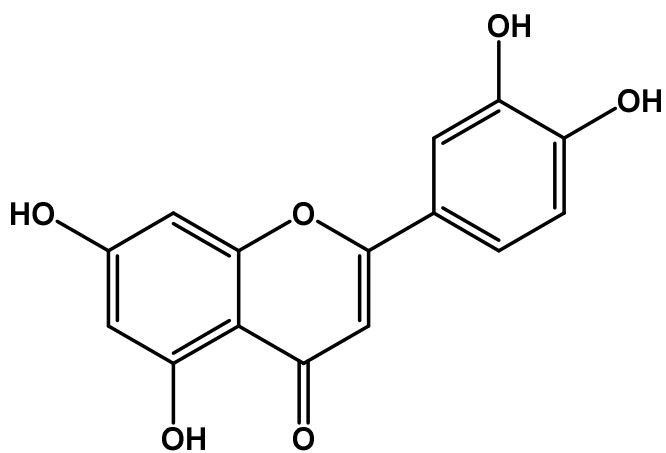

luteolin (MW = 286)

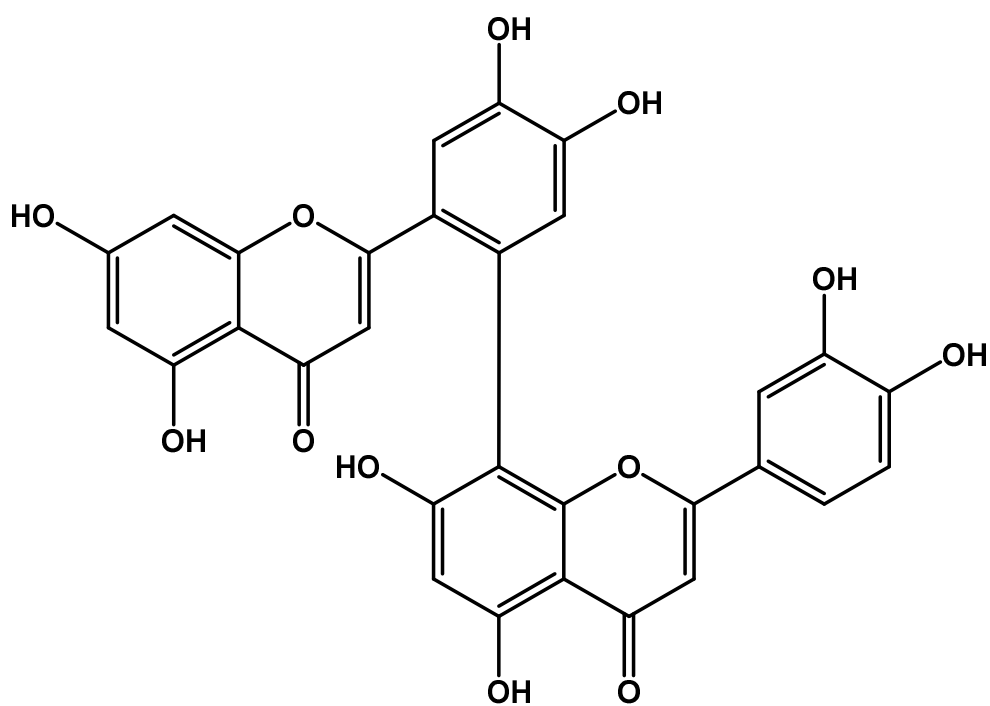

philonotisflavone (MW = 570)

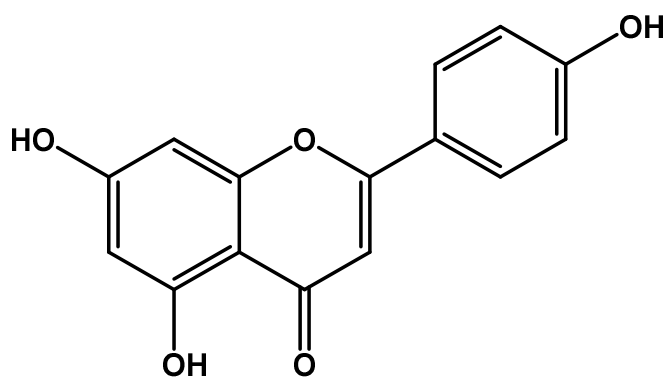

apigenin (MW = 270)

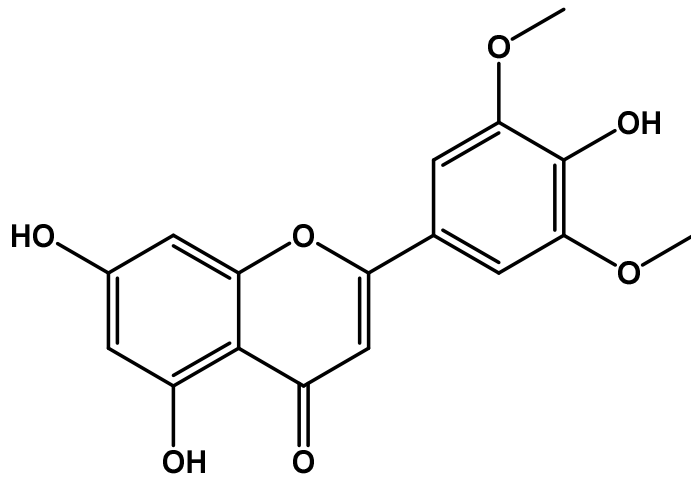

tricin (MW = 330)

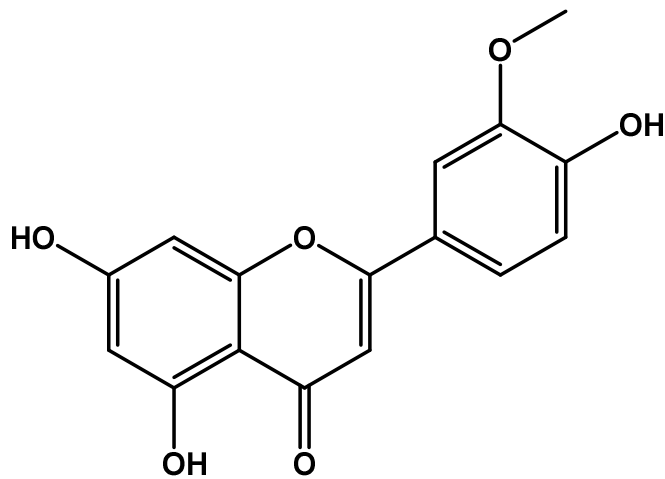

chrysoeriol (MW = 300)

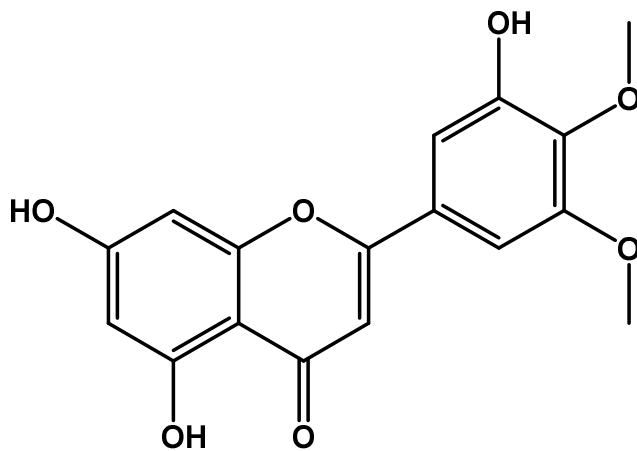

apometzgerin (MW = 330)



**Figure S2.** Structures of 14 fully identified metabolites in methanol extract and prepared phenolic preparations of *Taraxacum officinale* fruits
